# Supplementary material
Source: ML conference proceedings conference paper supplement (https://aclanthology.org/2024.lrec-main.1206)

Stage I: Problem Initialization

[Base Prompt]

answer the following questions:  
Provide predicates that describe the characters and their relationships in the story. ;  
Initial states, beliefs, and characters at the start of the story in predicates;  
Count and list of significant events in the story in predicates;  
Drawing a chronological timeline of events; for each major event, list how characters or objects' states and beliefs are affected;  
Use of "forecast" and "backslash" techniques by the author, detail the events associated with each using predicates.  
Identification of literary tropes in the story, offering explanations for their use;  
Analysis of the author's change in perspectives

[Ground Truth Story]

Agent A

Stage II: Multi-Agent Optimization

Use the following annotated predicates and specific information to craft a story:

[Generated Annotation]

[Reconstructed Story]

Here is the actual ground truth of the story and instruction of annotation.

[Ground Truth Story]

[Current Prompt]

Analyze the differences and explains what other information you need to improve the generated story

...

Agent B

$\times N_{iter}$

Context

Here is the feedback I have:

[Annotation Feedback]

let's fix it in prompt further

[Updated Prompt]

----- New Term -----

[Updated Prompt]

[Ground Truth Story]

...

Agent A

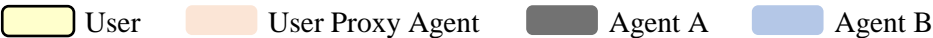

Supplement: OptionalSupplementaryMaterial [file 2024.lrec-main.1206.OptionalSupplementaryMaterial.zip]
