# Supplementary material
Source: ML conference proceedings conference paper supplement (https://aclanthology.org/2024.lrec-main.1206)

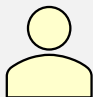

**User**

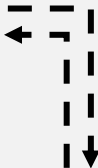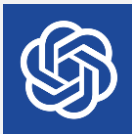

**Agent B**

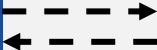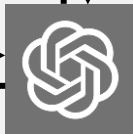

**Agent A**

Supplement: OptionalSupplementaryMaterial [file 2024.lrec-main.1206.OptionalSupplementaryMaterial.zip]

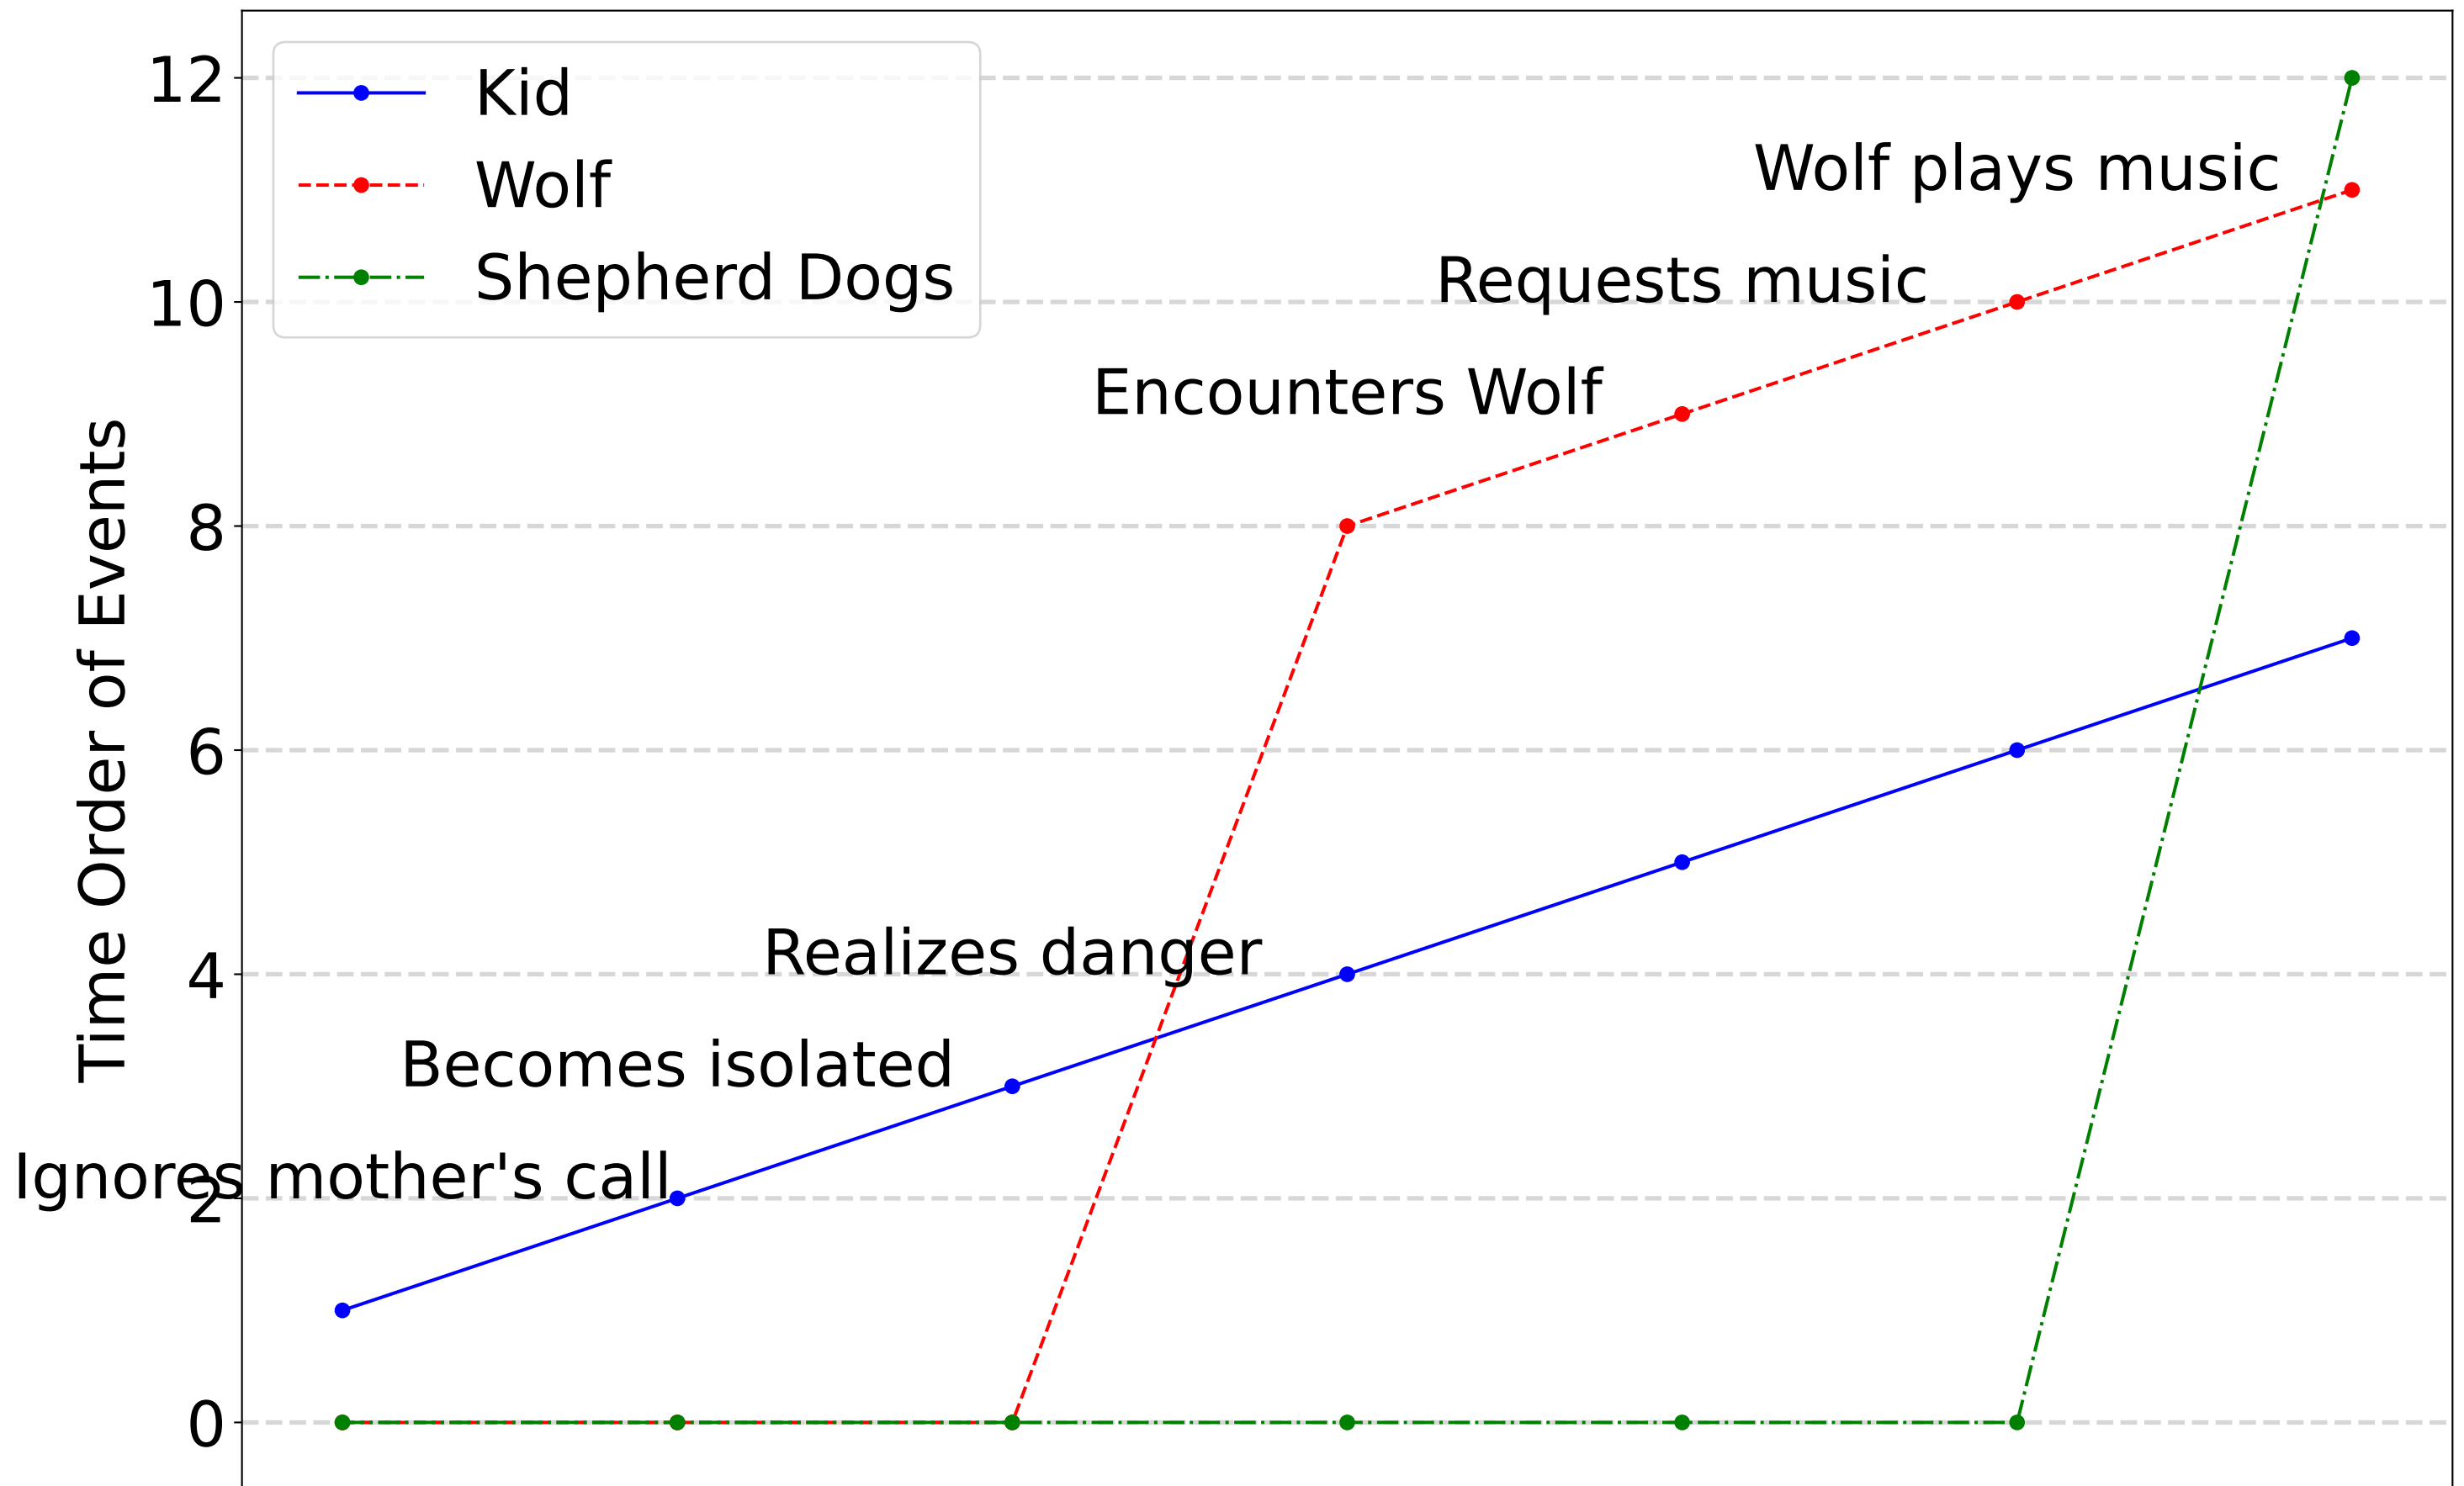

Supplement: OptionalSupplementaryMaterial [file 2024.lrec-main.1206.OptionalSupplementaryMaterial.zip]

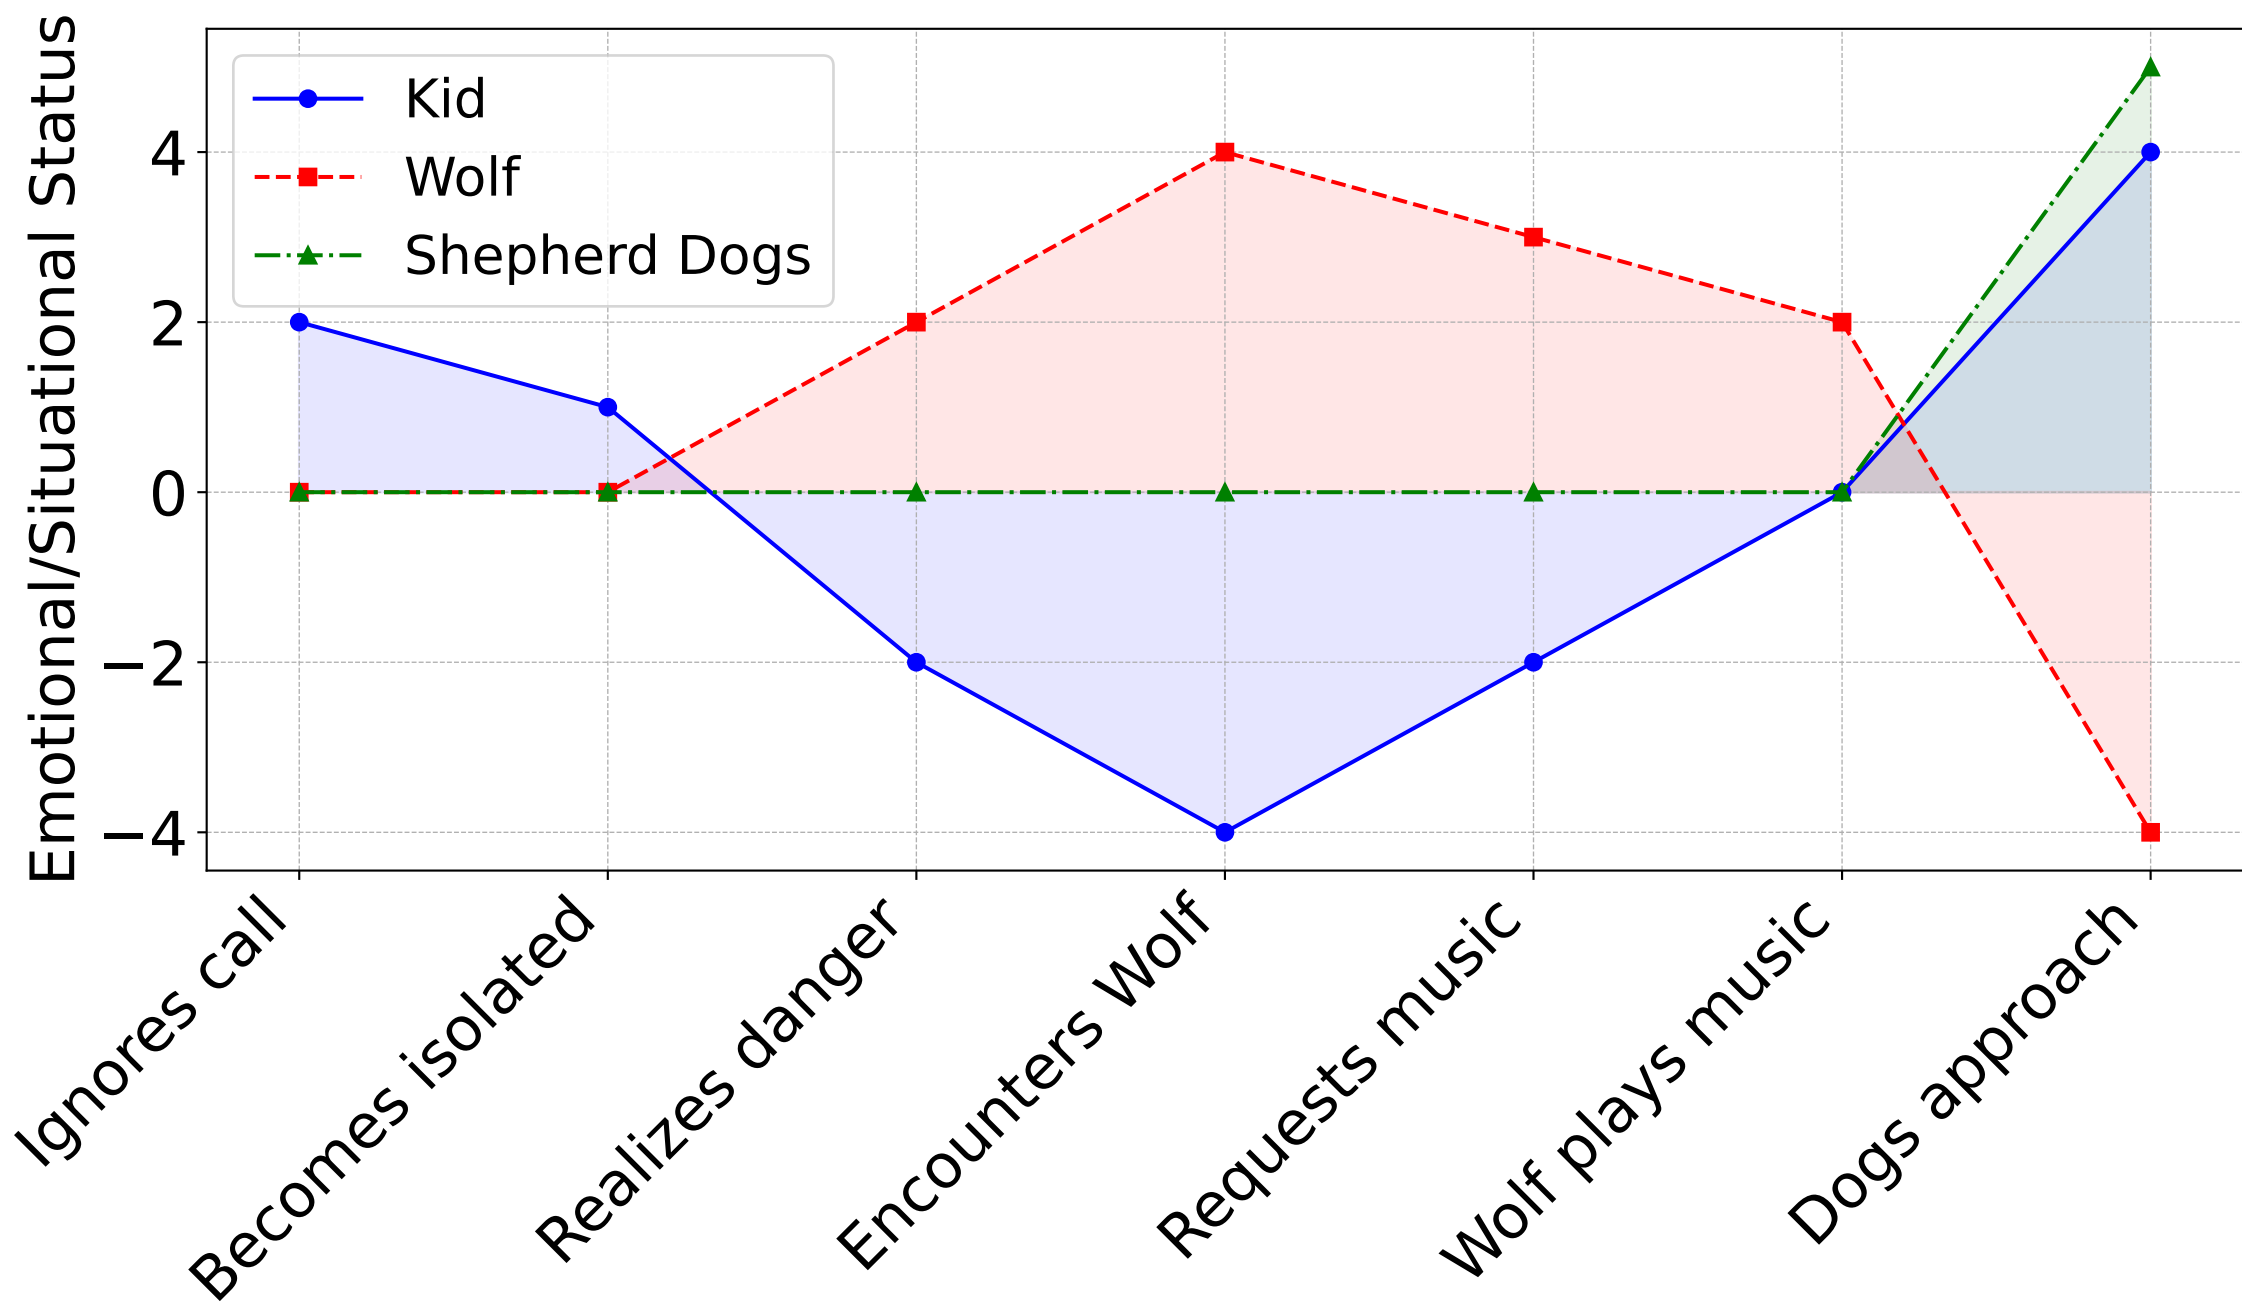

Supplement: OptionalSupplementaryMaterial [file 2024.lrec-main.1206.OptionalSupplementaryMaterial.zip]

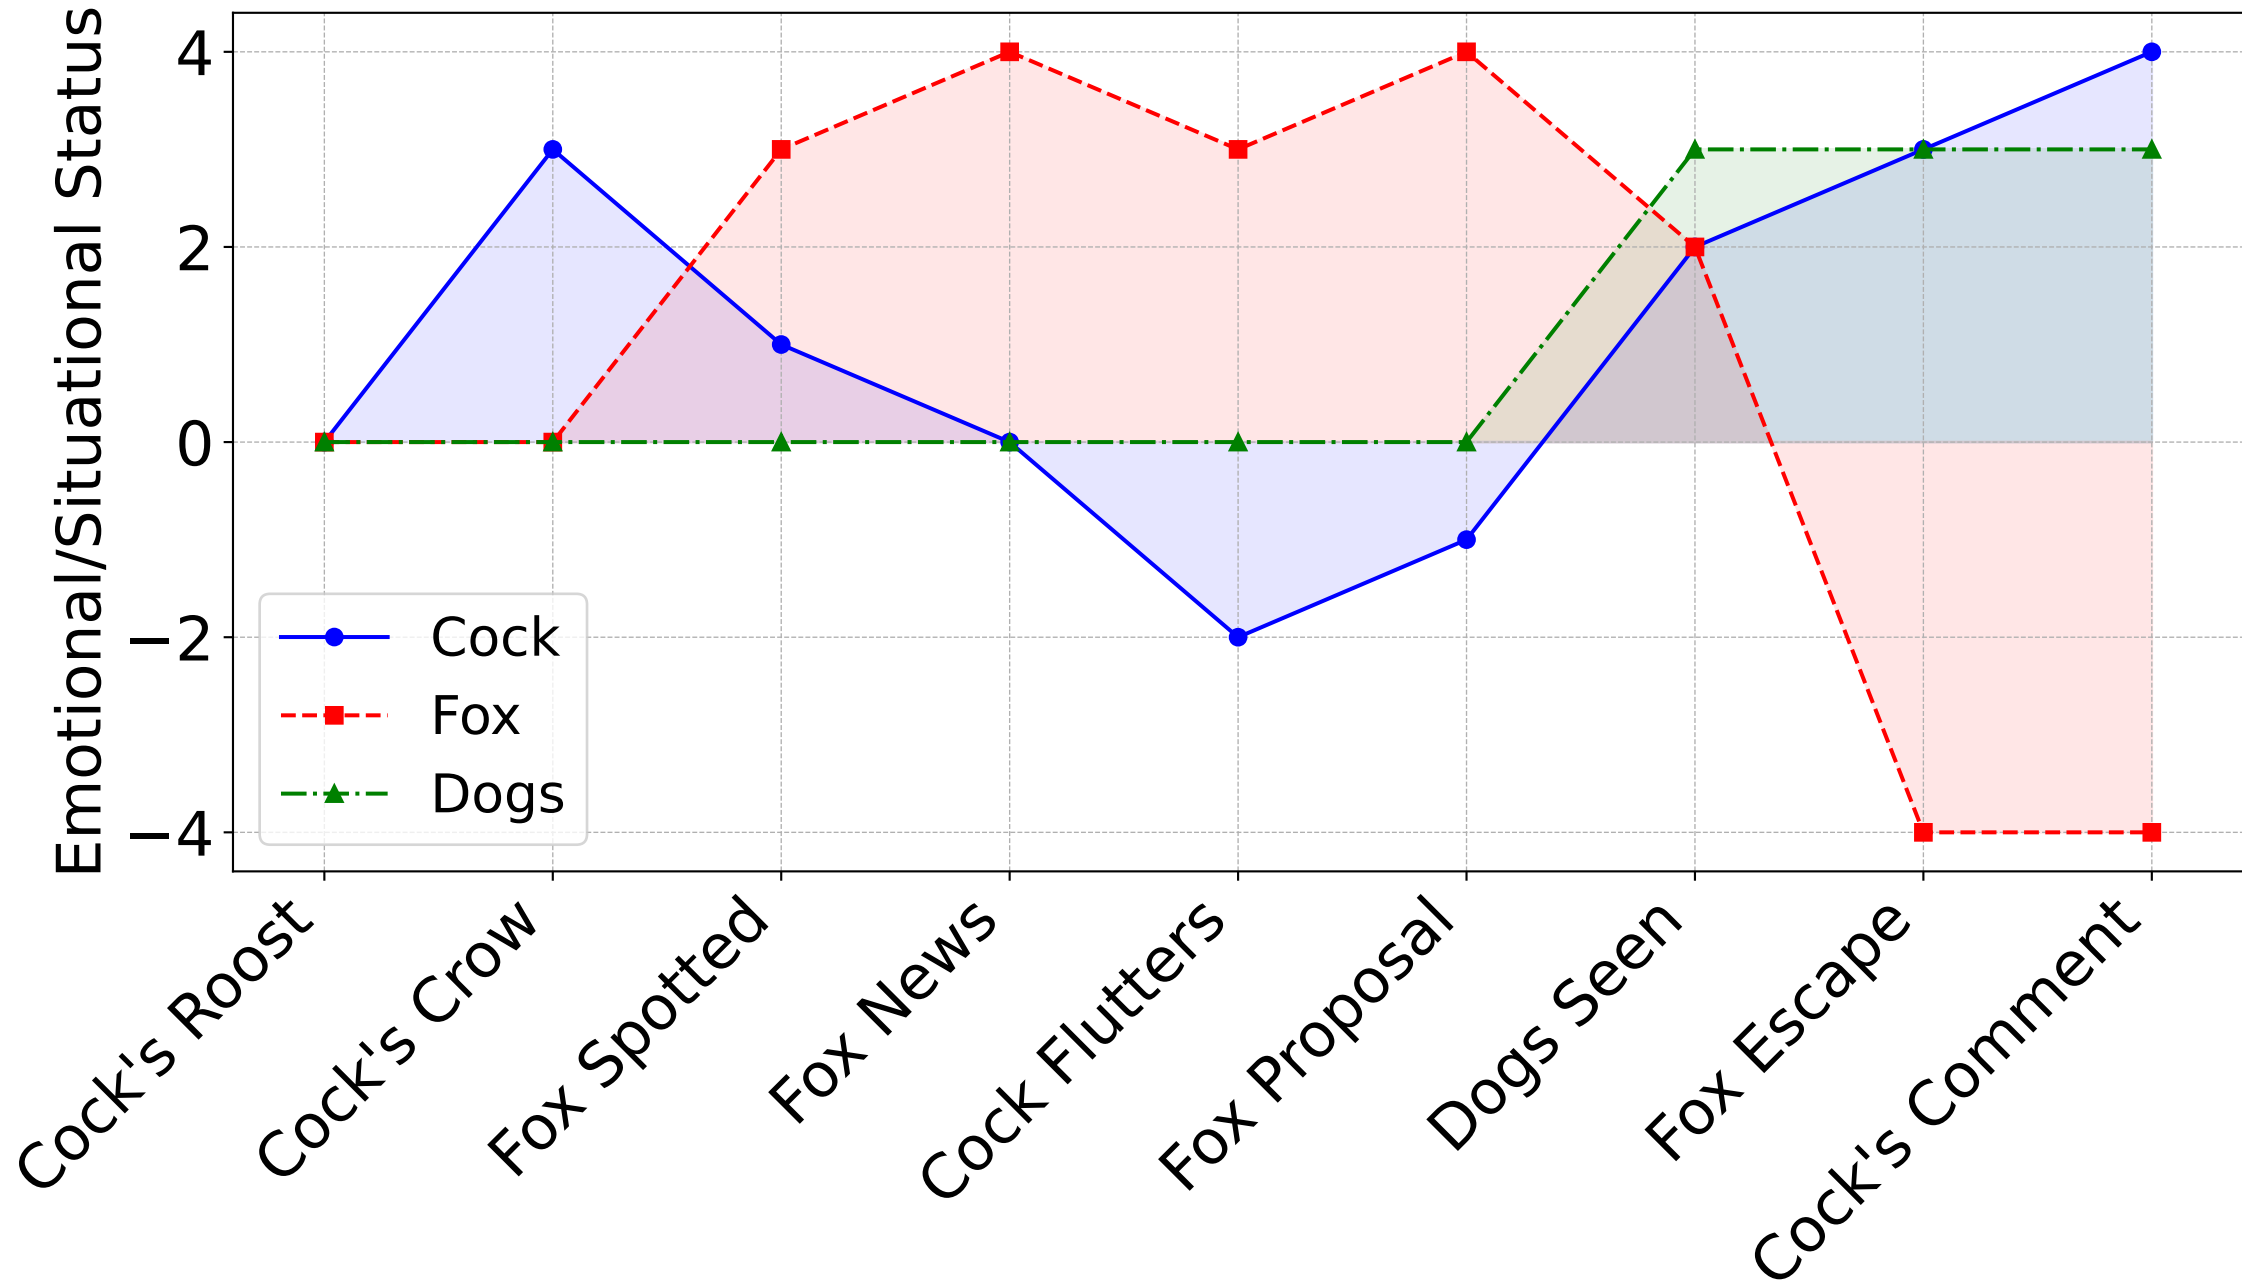

Supplement: OptionalSupplementaryMaterial [file 2024.lrec-main.1206.OptionalSupplementaryMaterial.zip]

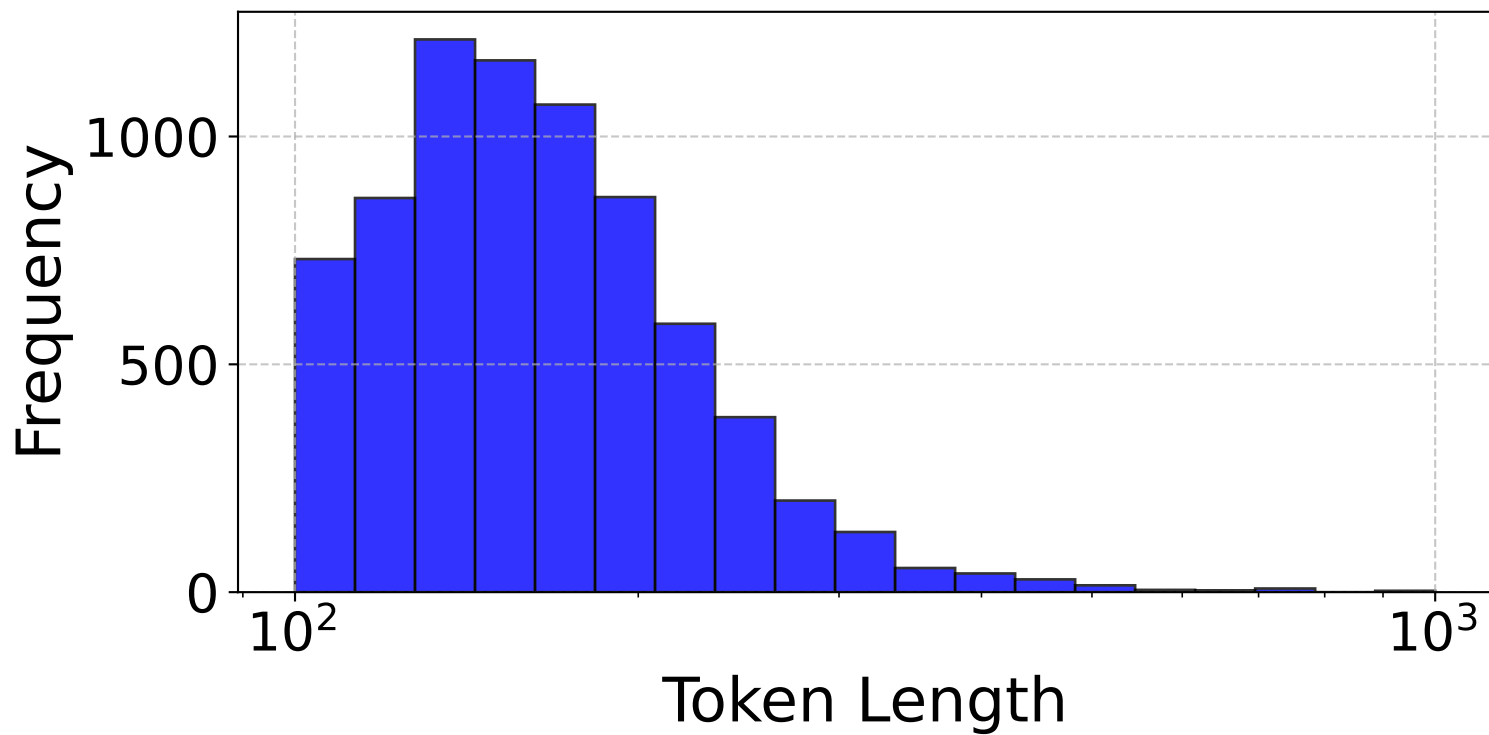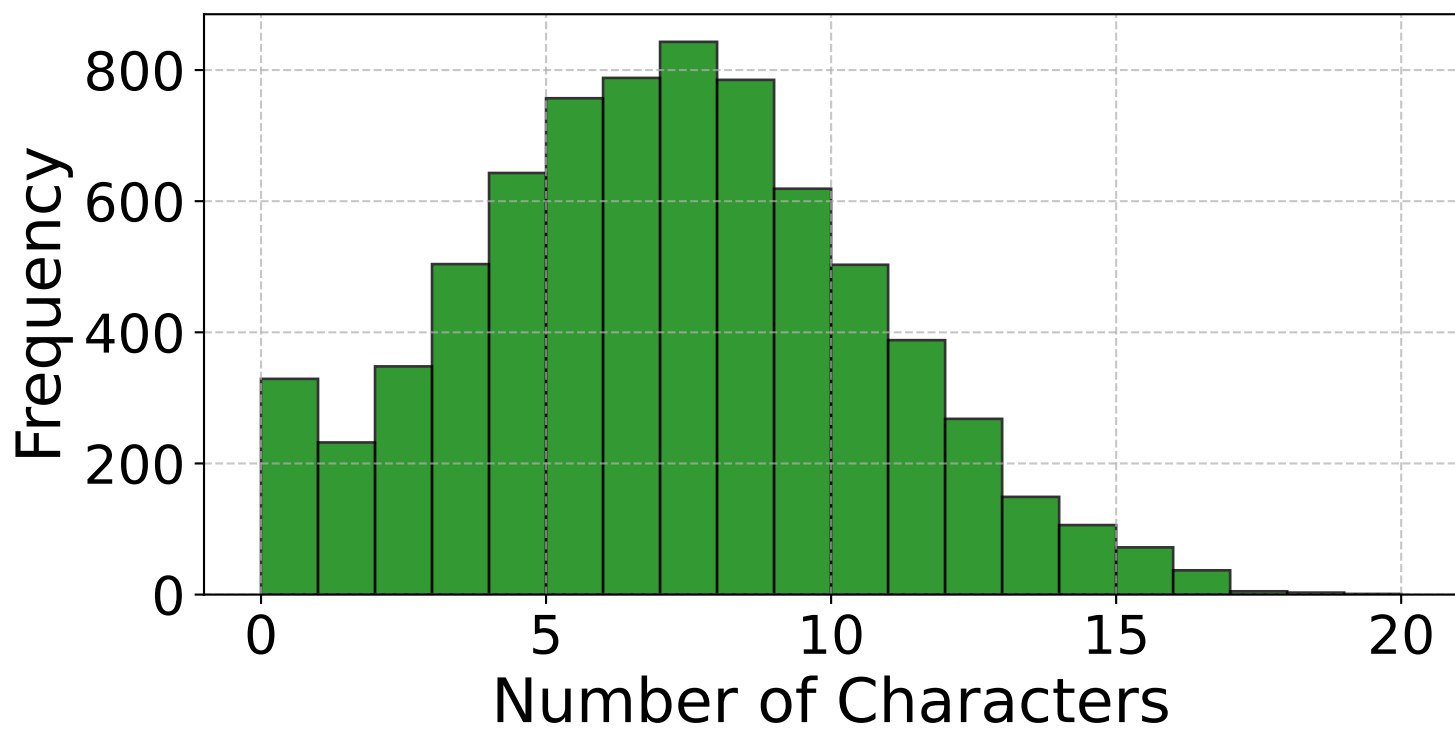

Supplement: OptionalSupplementaryMaterial [file 2024.lrec-main.1206.OptionalSupplementaryMaterial.zip]

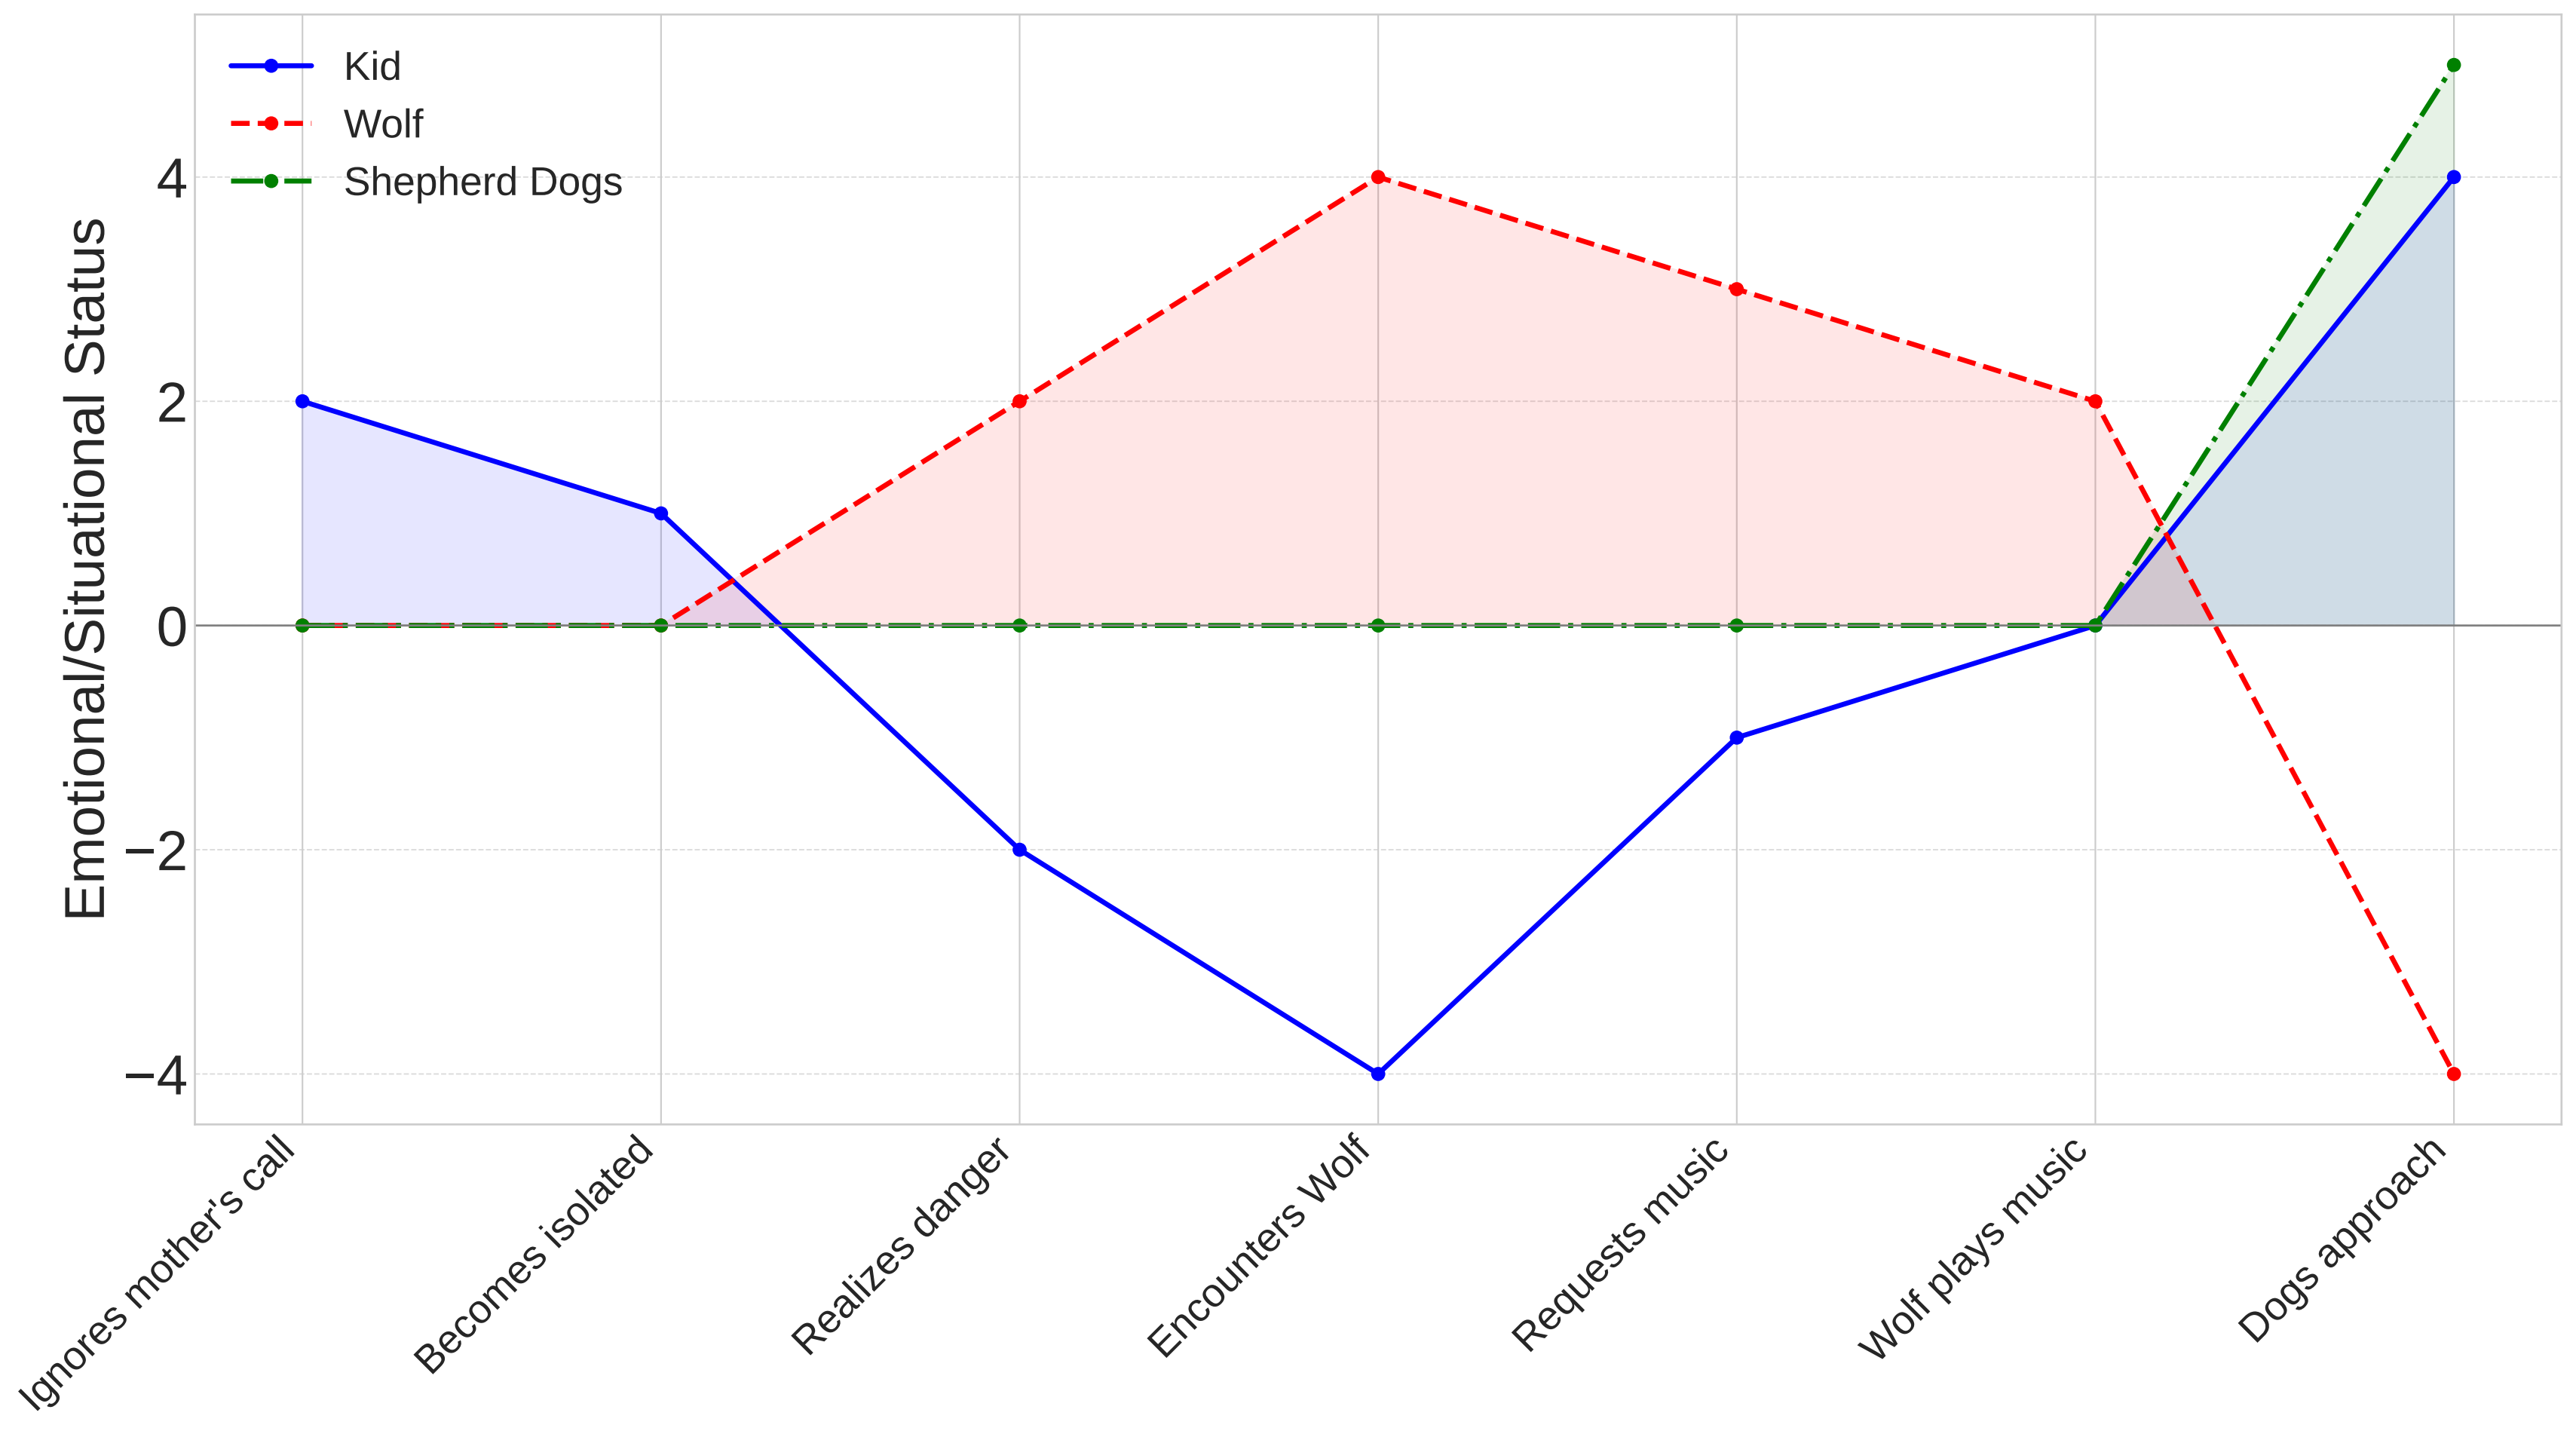

Supplement: OptionalSupplementaryMaterial [file 2024.lrec-main.1206.OptionalSupplementaryMaterial.zip]

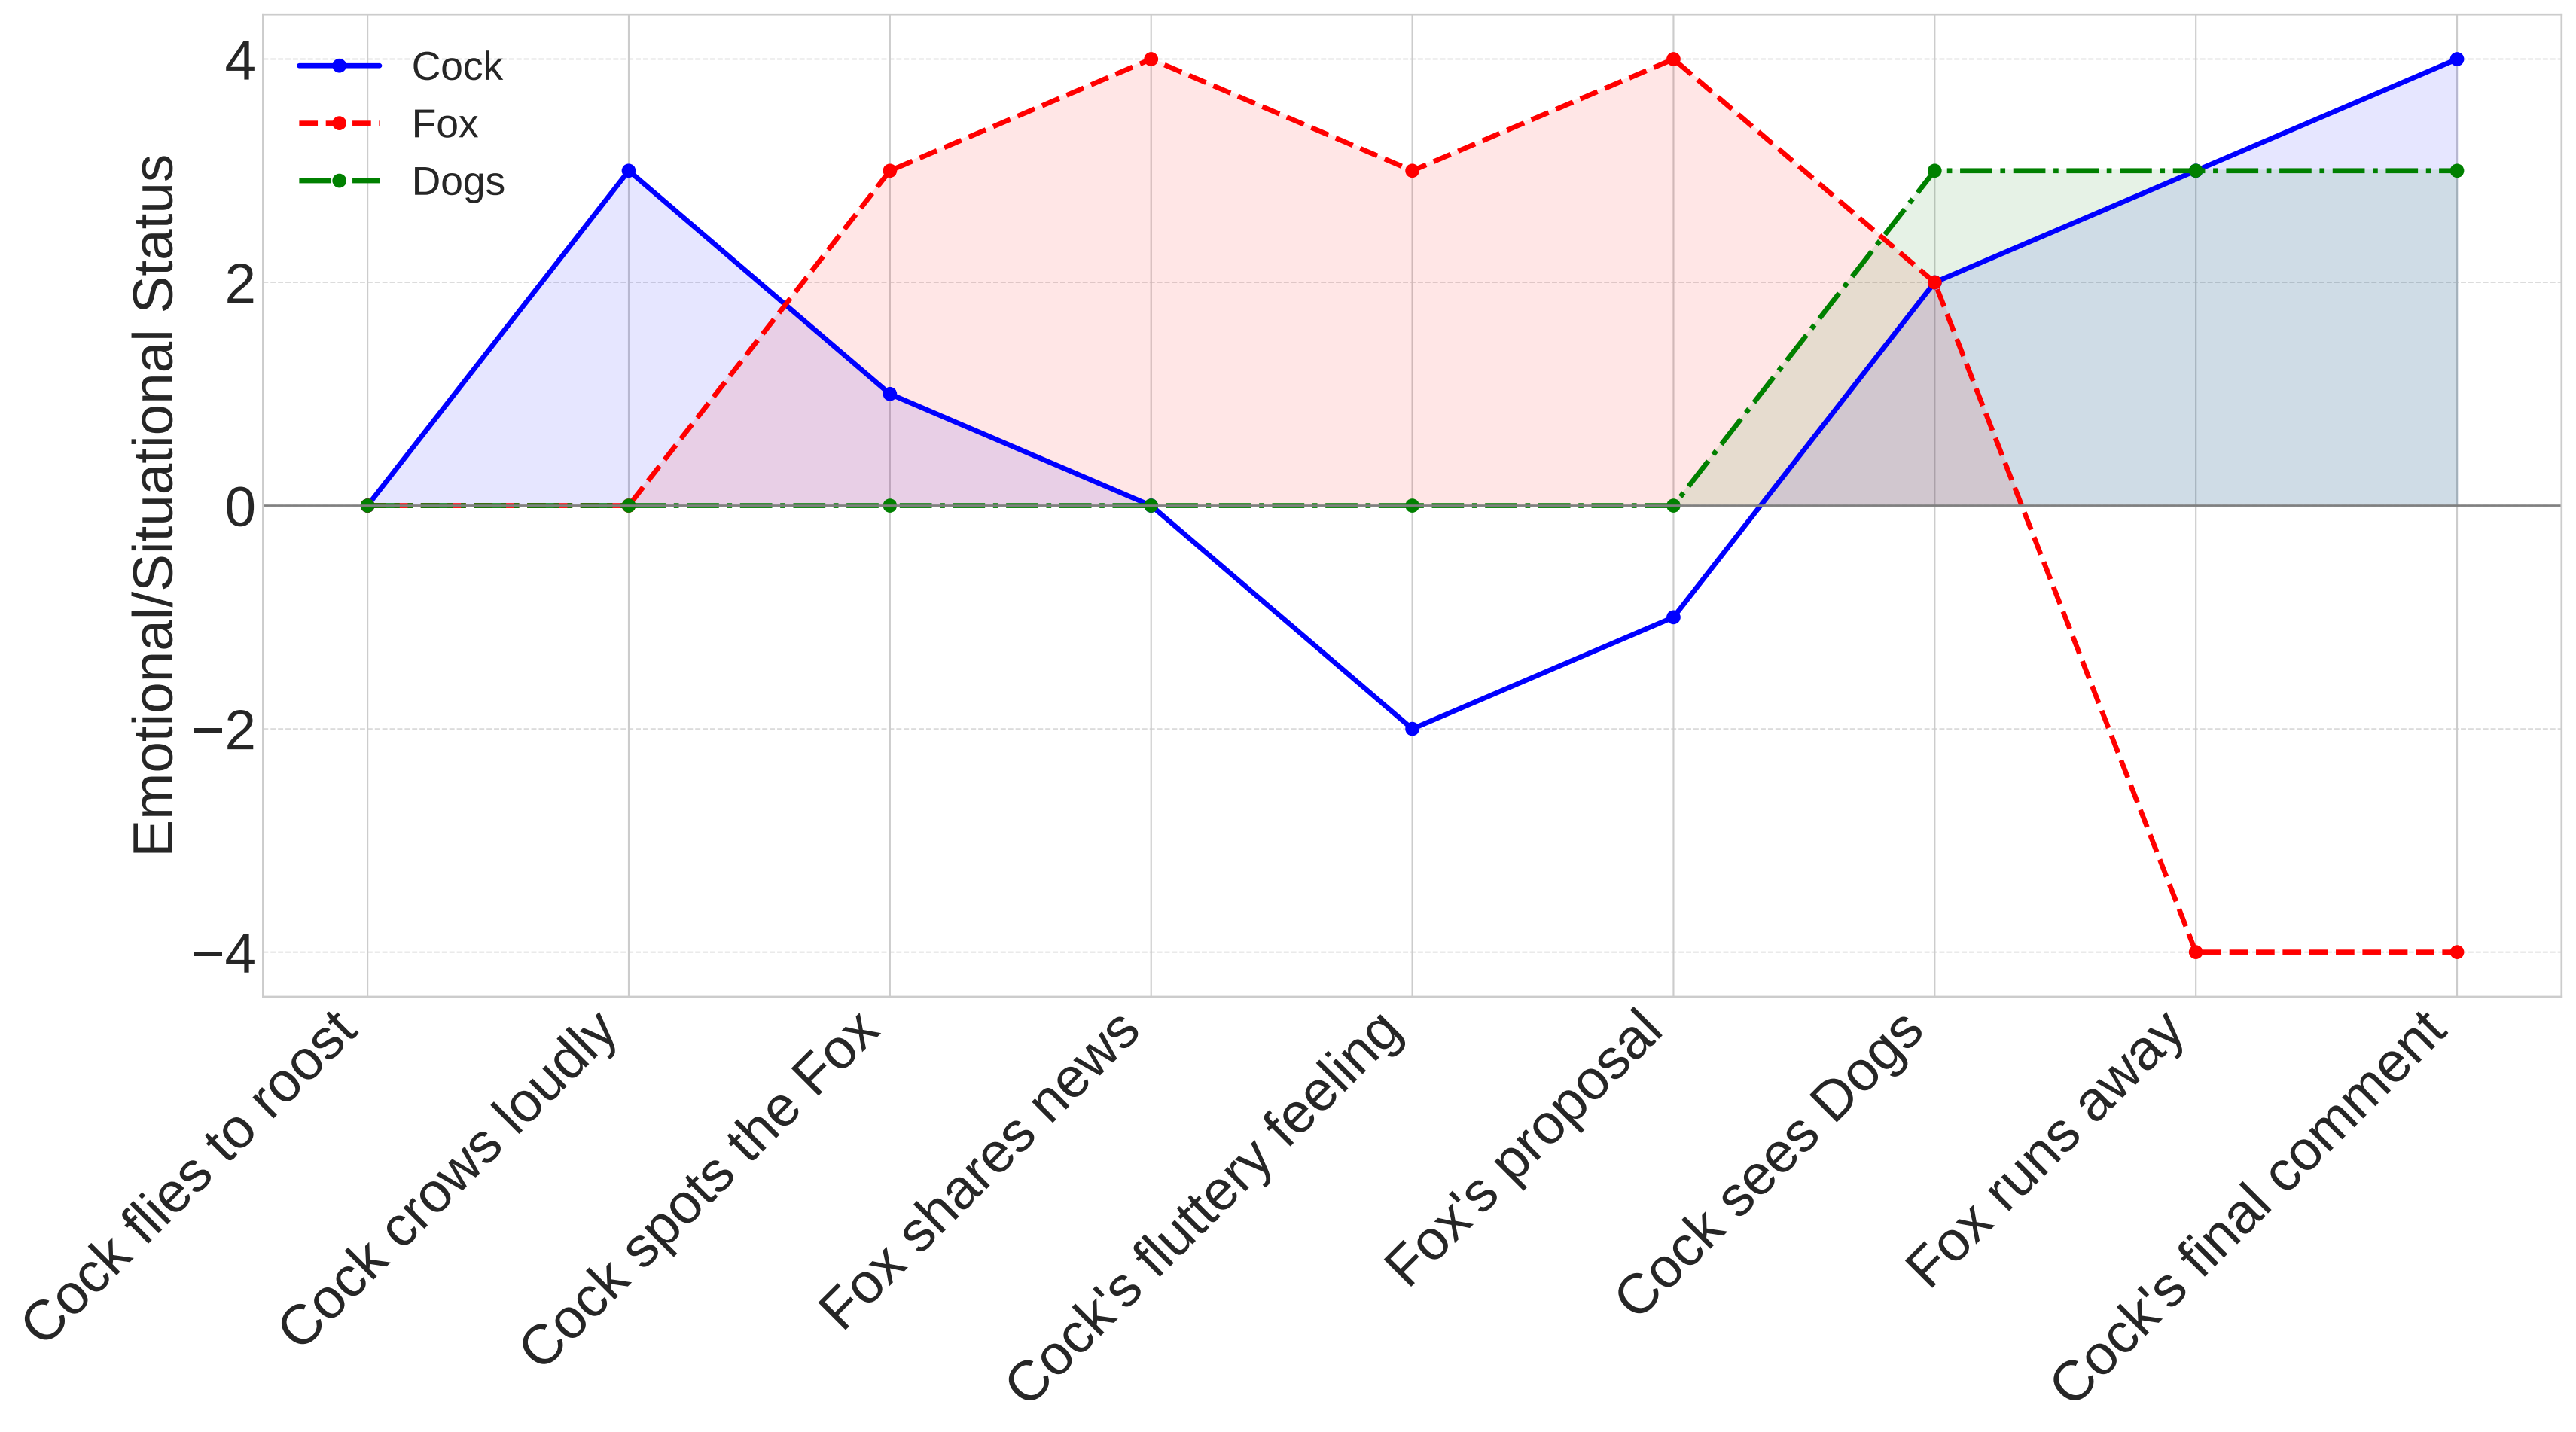

Supplement: OptionalSupplementaryMaterial [file 2024.lrec-main.1206.OptionalSupplementaryMaterial.zip]
